# Supplementary material for: High-efficiency electrosynthesis of ammonia with selective reduction of nitrite over an Ag nanoparticle-decorated TiO2 nanoribbon array
Source: Royal Society of Chemistry journal article supplement (doi:10.1039/d2qi02409h), 2023-01-01
Supplement: d2qi02409h1.pdf [file d2qi02409h1.pdf]

## Electronic Supplementary Information

### Experimental Section

**Materials:** Sodium nitrite ( $\text{NaNO}_2$ , 99.9%), ammonium chloride ( $\text{NH}_4\text{Cl}$ ), sodium hydroxide ( $\text{NaOH}$ ), sodium salicylate ( $\text{C}_7\text{H}_5\text{NaO}_3$ ), trisodium citrate dehydrate ( $\text{C}_6\text{H}_5\text{Na}_3\text{O}_7 \cdot 2\text{H}_2\text{O}$ ), p-dimethylaminobenzaldehyde ( $\text{C}_9\text{H}_{11}\text{NO}$ ), sodium nitroferricyanide dehydrate ( $\text{C}_5\text{FeN}_6\text{Na}_2\text{O} \cdot 2\text{H}_2\text{O}$ ) and sodium hypochlorite solution ( $\text{NaClO}$ ) were purchased from Aladdin Co., Ltd. (Shanghai, China). Sulfuric acid ( $\text{H}_2\text{SO}_4$ ), hydrogen peroxide ( $\text{H}_2\text{O}_2$ ), hydrochloric acid ( $\text{HCl}$ ), acetone hydrazine monohydrate ( $\text{N}_2\text{H}_4 \cdot \text{H}_2\text{O}$ ), and ethanol were bought from Beijing Chemical Corporation. (China). Silver nitrate ( $\text{Ag}(\text{NO}_3)_2 \cdot 6\text{H}_2\text{O}$ , >98%) was purchased from Chengdu Kelong Chemical Regent Co. Ltd. Titanium plate (TP, 0.4 mm thick) was purchased from Qingyuan Metal Materials Co., Ltd (Xingtai, China). All reagents used in this work are analytical grade without further purification.

**Preparation of  $\text{Ag}@\text{TiO}_2/\text{TP}$ :** TP ( $2.0 \times 3.0 \text{ cm}^2$ ) was firstly sonicated in  $\text{HCl}$ , acetone, and water for 10 min, respectively. The pretreated TP was then put into 5 M  $\text{NaOH}$  solutions in Teflon-lined autoclave and heated at  $180^\circ\text{C}$  for 24 h to get  $\text{Na}_2\text{Ti}_2\text{O}_5/\text{TP}$ . Subsequently, the obtained  $\text{Na}_2\text{Ti}_2\text{O}_5/\text{TP}$  was immersed in 0.1 M  $\text{Ag}(\text{NO}_3)_2 \cdot 6\text{H}_2\text{O}$  for 10 h to exchange  $\text{Na}^+$  with  $\text{Ag}^+$ , followed by washing with water and dried. Finally,  $\text{AgTi}_2\text{O}_5/\text{TP}$  was annealed at  $500^\circ\text{C}$  for 2h under  $\text{Ar}/\text{H}_2$  atmosphere, and  $\text{Ag}@\text{TiO}_2/\text{TP}$  was eventually obtained. As a control,  $\text{TiO}_2/\text{TP}$  was synthesized by the identical fabrication process of  $\text{Ag}@\text{TiO}_2/\text{TP}$ , but immersing the  $\text{Na}_2\text{Ti}_2\text{O}_5/\text{TP}$  into diluted  $\text{HCl}$  to exchange  $\text{Na}^+$  to  $\text{H}^+$ .

**Characterizations:** X-ray diffraction (XRD) data were acquired by diffraction instrument with a  $\text{Cu K}\alpha$  radiation (Shimadzu XRD-6100). SEM measurements were carried out on a GeminiSEM 300 scanning electron microscope (ZEISS, Germany) at an accelerating voltage of 5 kV. TEM image was gotten by a Zeiss Libra 200FE transmission electron microscope operated at 200 kV. X-ray photoelectron spectroscopy (XPS) data were acquired by an X-ray photoelectron spectrometer

(ESCALABMK II) with Mg as the exciting source. UV–vis spectrophotometer (Shimadzu UV-1800) was used to gain the absorbance data. Gas chromatography analysis was performed on a Shimadzu GC-2014C with Ar as carrier gas.

**Electrochemical measurements:** The electrolysis was performed in an H-type cell separated by a Nafion 117 membrane, using Ag@TiO<sub>2</sub>/TP (1 × 0.5 cm<sup>2</sup>) as the working electrode with a CHI 660E electrochemical workstation (Shanghai, Chenhua). A commercial graphite rod and Hg/HgO were used as counter and reference electrodes. The two compartments of H-type cell were filled with 35 mL Ar-saturated electrolyte solution (0.1 M NaOH with and without 0.1 M NO<sub>2</sub><sup>-</sup>). The curves of linear sweep voltammetry (LSV) were recorded at a scan rate of 10 mV s<sup>-1</sup> from 0.2 to -0.8 V. The chronoamperometry was conducted at different potentials and cycle tests for 1 h, and the stability tests for 12-h. All potentials reported in our work were converted to reversible hydrogen electrode via calibration with the following equation: E (RHE) = E (Hg/HgO) + (0.098+0.0591×pH) V.

**Determination of NH<sub>3</sub>:** The NH<sub>3</sub> concentration in the solution was determined by colorimetry (the obtained electrolyte was diluted 40 times) using the indophenol blue method.<sup>1</sup> In detail, 2 mL of the solution after reaction was mixed with 2 mL of 1 M NaOH coloring solution containing 5% C<sub>7</sub>H<sub>5</sub>NaO<sub>3</sub> and 5% C<sub>6</sub>H<sub>5</sub>Na<sub>3</sub>O<sub>7</sub>·2H<sub>2</sub>O. Then, 1 mL oxidizing solution of 0.05 M NaClO and 0.2 mL catalyst solution of C<sub>5</sub>FeN<sub>6</sub>Na<sub>2</sub>O (1 wt%) were added to the above solution. After standing in the dark for 2 h, the UV–vis absorption spectra were measured. The concentration of NH<sub>3</sub> was identified using the absorbance at a wavelength of 655 nm. The concentration-absorbance curve was calibrated using the standard NH<sub>4</sub>Cl solution with NH<sub>3</sub> concentrations of 0.2, 0.5, 1.0, 2.0, 5.0 and 10.0 ppm in 0.1 M NaOH solution. The fitting curve ( $y = 0.377x + 0.06791$ ,  $R^2 = 0.99794$ ) shows good linear relation of absorbance value with NH<sub>3</sub> concentration.

**Determination of N<sub>2</sub>H<sub>4</sub>:** The N<sub>2</sub>H<sub>4</sub> was estimated by the Watt and Chrisp method.<sup>2</sup> The color reagent was a solution of 18.15 mg mL<sup>-1</sup> of C<sub>9</sub>H<sub>11</sub>NO in the mixed solvent of HCl and ethanol (V/V: 1/10). In detail, 2 mL electrolyte was added into 2 mL color

reagent for 15 min under stirring. The absorbance of such solution was measured to quantify the hydrazine yields by the standard curve of hydrazine ( $y = 0.69x + 0.0658$ ,  $R^2 = 0.99989$ ).

**Determination of N<sub>2</sub> and H<sub>2</sub>:** N<sub>2</sub> and H<sub>2</sub> were quantified by gas chromatography (GC).

**Calculations of NH<sub>3</sub> FE and NH<sub>3</sub> yield:**

The amount of NH<sub>3</sub> ( $m_{\text{NH}_3}$ ) was calculated by the following equation:

$$m_{\text{NH}_3} = [\text{NH}_3] \times V$$

NH<sub>3</sub> FE was calculated by the following equation:

$$\text{FE} = (6 \times F \times [\text{NH}_3] \times V) / (M_{\text{NH}_3} \times Q) \times 100\%$$

NH<sub>3</sub> yield was calculated using the following equation:

$$\text{NH}_3 \text{ yield} = ([\text{NH}_3] \times V) / (M_{\text{NH}_3} \times t \times A)$$

Where F is the Faraday constant (96485 C mol<sup>-1</sup>), [NH<sub>3</sub>] is the NH<sub>3</sub> concentration, V is the volume of electrolyte in the anode compartment (35 mL), M<sub>NH<sub>3</sub></sub> is the molar mass of NH<sub>3</sub> molecule, Q is the total quantity of applied electricity, t is the electrolysis time (1 h), and A is the geometric area of the working electrode (1 × 0.5 cm<sup>2</sup>).

The partial current density of NH<sub>3</sub> ( $j_{\text{NH}_3}$ ) was calculated as:

$$j_{\text{NH}_3} = \text{FE}_{\text{NH}_3} \times I_{\text{it}}$$

where  $I_{\text{it}}$  is the average current density (mA cm<sup>-2</sup>) during the potentiostatic tests at given potentials.

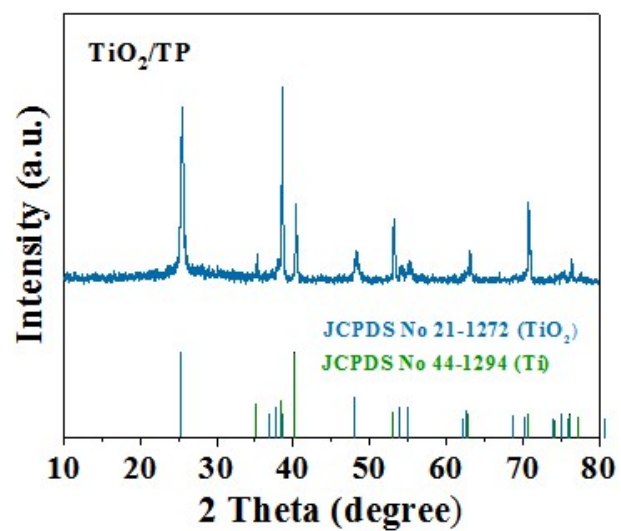

Fig. S1. XRD pattern of TiO<sub>2</sub>/TP.

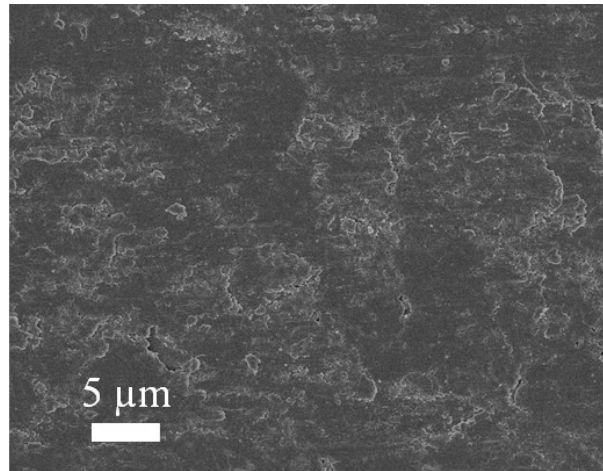

**Fig. S2.** SEM image of TP.

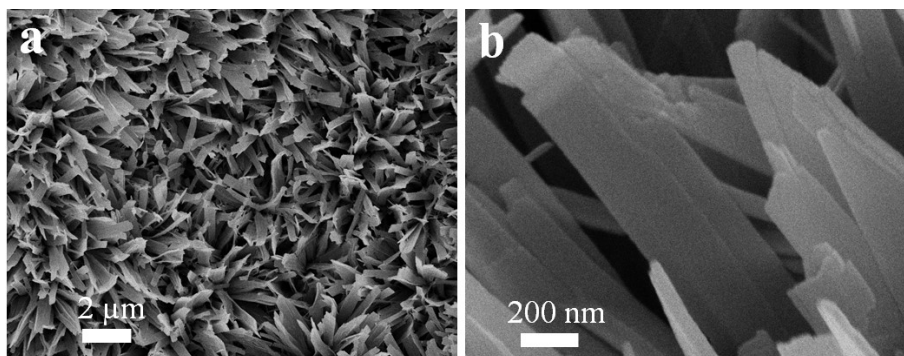

**Fig. S3.** SEM images of TiO<sub>2</sub>/TP.

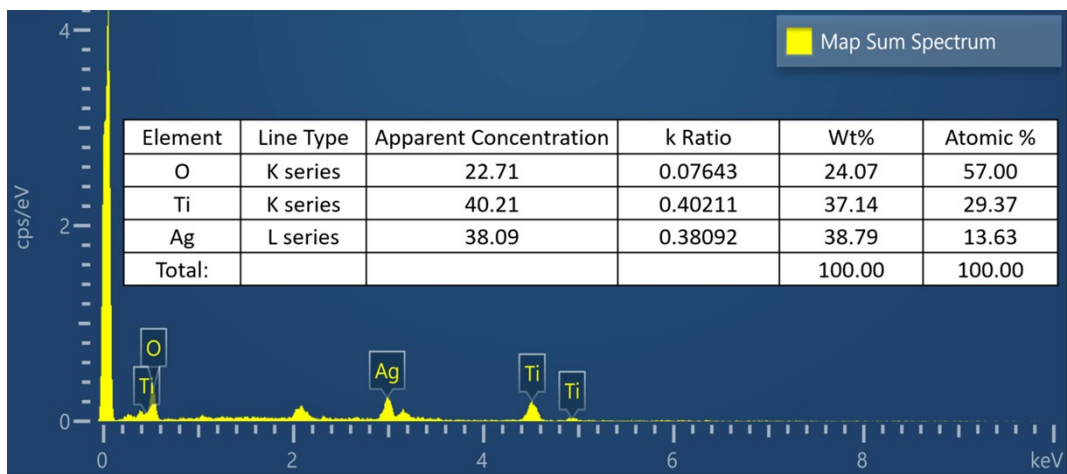

**Fig. S4.** EDX spectrum of Ag@TiO<sub>2</sub>/TP.

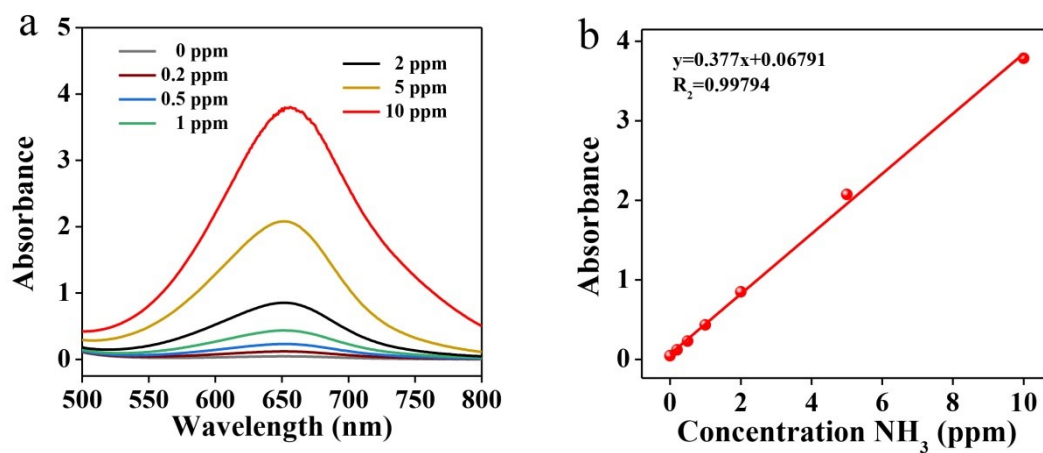

**Fig. S5.** (a) UV-vis absorption spectra and (b) corresponding calibration curve used for calculation of  $\text{NH}_3$  concentration.



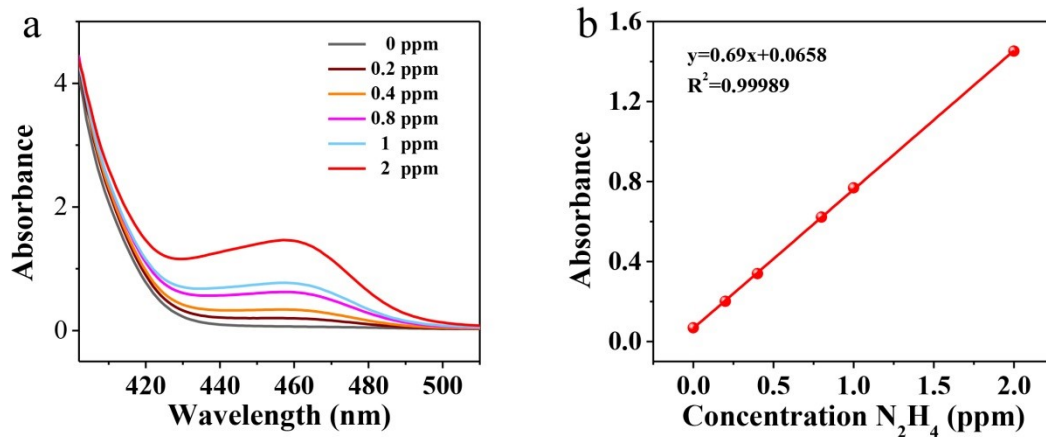

**Fig. S6.** (a) UV-vis absorption spectra and (b) corresponding calibration curve used for calculation of  $N_2H_4$  concentration.

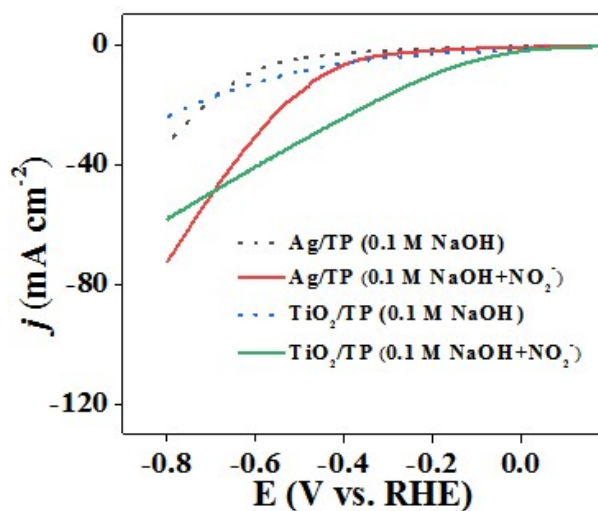

**Fig. S7.** LSV curves of TiO<sub>2</sub>/TP and Ag/TP in 0.1 M NaOH with/without 0.1 M NO<sub>2</sub><sup>-</sup>.

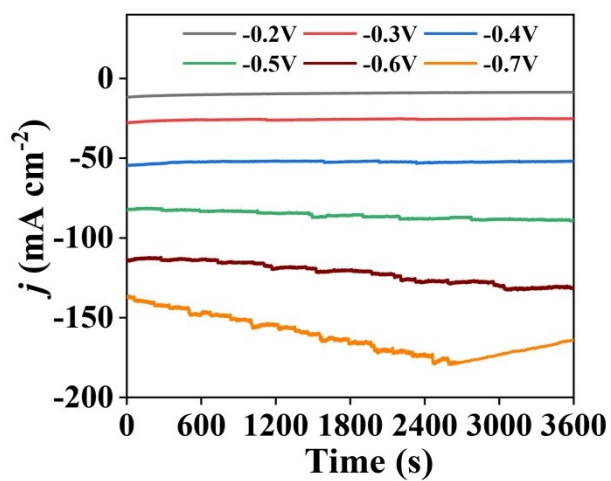

**Fig. S8.** Chronoamperometry curves of Ag@TiO<sub>2</sub>/TP for the NO<sub>2</sub><sup>-</sup>RR at different applied potentials.

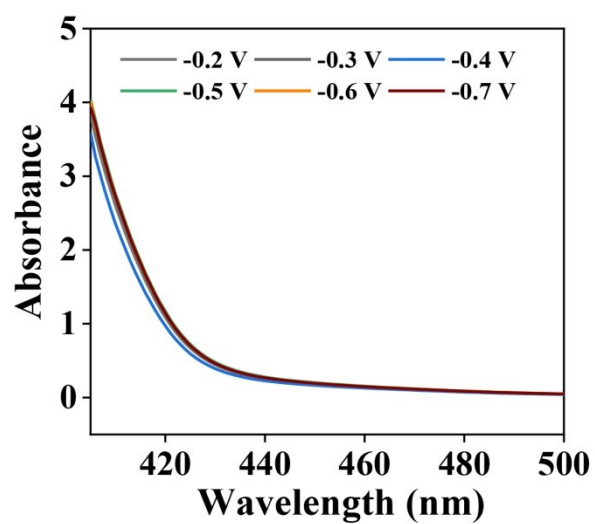

**Fig. S9.** UV-vis absorption spectra of  $N_2H_4$  of  $Ag@TiO_2/TP$  at different given potentials.

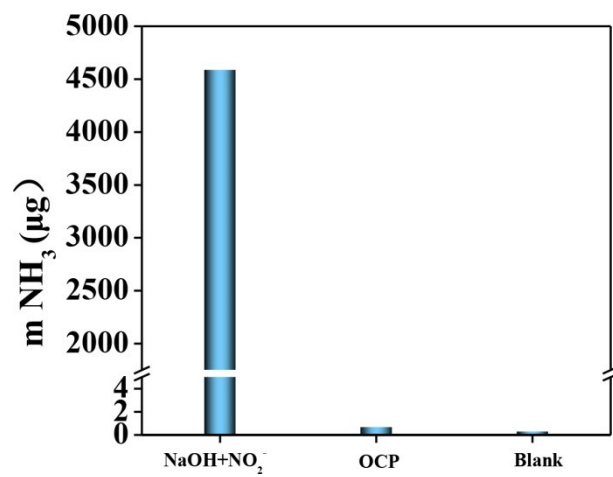

**Fig. S10.**  $\text{NO}_2^-$ RR performance of Ag@ $\text{TiO}_2$ /TP under different test conditions.

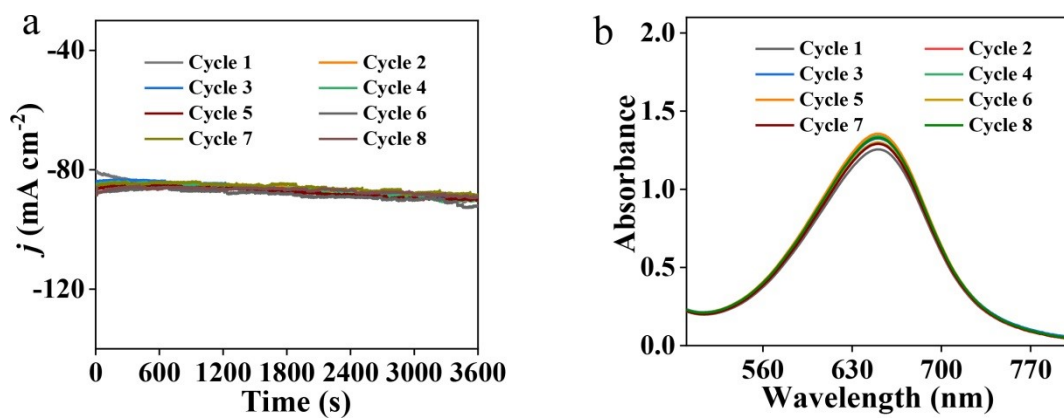

**Fig. S11.** (a) CA curves and (b) corresponding UV-vis spectra of Ag@TiO<sub>2</sub>/TP for NH<sub>3</sub> generation during recycling tests at -0.5 V.

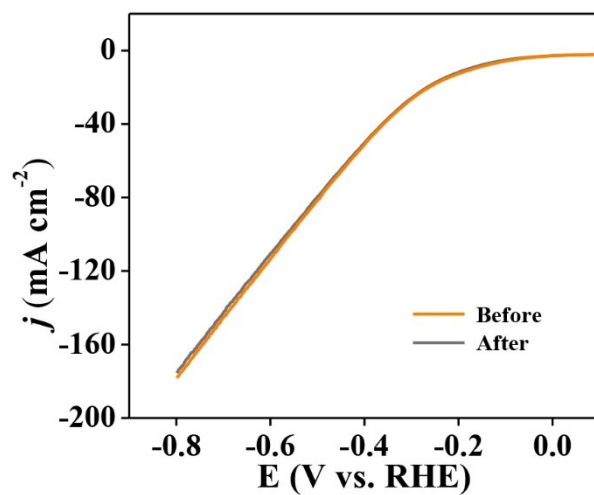

**Fig. S12.** LSV curves of Ag@TiO<sub>2</sub>/TP in 0.1 M NaOH with 0.1 M NO<sub>2</sub><sup>-</sup> before and after long-time electrolysis.

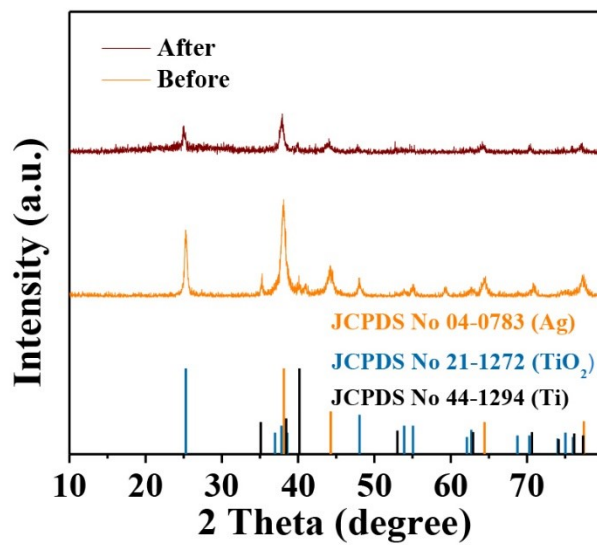

**Fig. S13.** XRD patterns of Ag@TiO<sub>2</sub>/TP before and after long-time electrolysis.

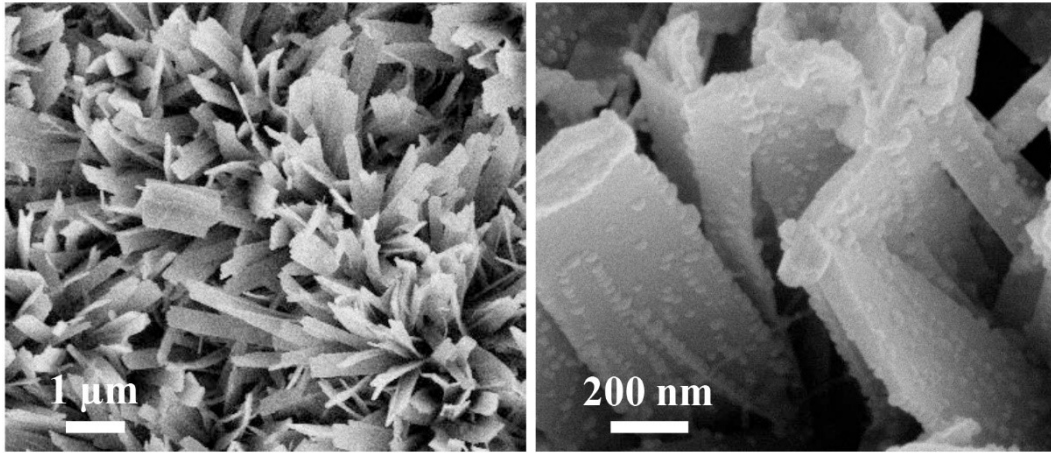

**Fig. S14.** SEM images of Ag@TiO<sub>2</sub>/TP after long-time electrolysis.



**Table S1.** Comparison of NH<sub>3</sub> yield and FE of Ag@TiO<sub>2</sub>/TP with other reported NO<sub>2</sub><sup>-</sup>RR electrocatalysts.

| Catalyst                    | Electrolyte                                                                      | NH <sub>3</sub> yield<br>(μg h <sup>-1</sup> cm <sup>-2</sup> ) | FE<br>(%)     | Potential<br>(V vs. RHE) | Ref       |
|-----------------------------|----------------------------------------------------------------------------------|-----------------------------------------------------------------|---------------|--------------------------|-----------|
| Ag@TiO <sub>2</sub> /TP     | 0.1 M NaOH<br>(0.1 M NO <sub>2</sub> <sup>-</sup> )                              | 8,743.1                                                         | 96.4          | -0.50                    | This work |
| Ag@NiO/CC                   | 0.1 M NaOH<br>(0.1 M NO <sub>2</sub> <sup>-</sup> )                              | 5,751                                                           | 96.1          | -0.70                    | 3         |
| TiO <sub>2-x</sub>          | 0.1 M NaOH<br>(0.1 M NO <sub>2</sub> <sup>-</sup> )                              | 7,898                                                           | 92.7          | -0.70                    | 4         |
| P-TiO <sub>2</sub>          | 0.5 M Na <sub>2</sub> SO <sub>4</sub><br>(50 ppm NO <sub>3</sub> <sup>-</sup> )  | 9,533.6                                                         | 90.6          | -0.60                    | 5         |
| CoB nanoarray               | 0.2 M Na <sub>2</sub> SO <sub>4</sub><br>(400 ppm NO <sub>2</sub> <sup>-</sup> ) | 3,962.7                                                         | 3,962.7       | -0.70                    | 6         |
| MnO <sub>2</sub> nanoarrays | 0.1 M Na <sub>2</sub> SO <sub>4</sub><br>(5 mM NO <sub>2</sub> <sup>-</sup> )    | 1.46 × 10 <sup>-10</sup>                                        | 6             | -1.75                    | 7         |
| Ni-NSA-V <sub>Ni</sub>      | 0.2 M Na <sub>2</sub> SO <sub>4</sub><br>(200 ppm NO <sub>2</sub> <sup>-</sup> ) | 4,011.7                                                         | 96.1          | -0.54                    | 8         |
| Cu <sub>3</sub> P NA/CF     | 0.1 M PBS<br>(0.1 M NO <sub>2</sub> <sup>-</sup> )                               | 1,626.6                                                         | 91.2 ±<br>2.5 | -0.50                    | 9         |
| Ni@MDC                      | 0.1 M NaOH<br>(0.1 M NO <sub>2</sub> <sup>-</sup> )                              | 5,100                                                           | 65.4          | -0.80                    | 10        |

## References

- 1 R. E. Ruther, R. J. Hamers, Photo-illuminated diamond as a solid-state source of solvated electrons in water for nitrogen reduction, *Nat. Mater.*, 2013, **12**, 836–841.
- 2 L. C. Green, D. A. Wagner, J. Glogowski, P. L. Skipper, J. S. Wishnok, S. R. Tannenbaum, Analysis of nitrate, nitrite, and [<sup>15</sup>N] nitrate in biological fluids, *Anal. Biochem.*, 1982, **126**, 131–138.
- 3 Q. Liu, G. Wen, D. Zhao, L. Xie, S. Sun, L. Zhang, Y. Luo, A. A. Alshehri, M. S. Hamdy, Q. Kong, X. Sun, Nitrite reduction over Ag nanoarray electrocatalyst for ammonia synthesis, *J. Colloid Interface Sci.*, 2022, **623**, 513–519.
- 4 D. Zhao, J. Liang, J. Li, L. Zhang, K. Dong, L. Yue, Y. Luo, Y. Ren, Q. Liu, M. S. Hamdy, Q. Kong, Q. Liu, X. Sun, A TiO<sub>2-x</sub> nanobelt array with oxygen vacancies: an efficient electrocatalyst toward nitrite conversion to ammonia, *Chem. Commun.*, 2022, **58**, 3669–3672.
- 5 L. Ouyang, X. He, S. Sun, Y. Luo, D. Zheng, J. Chen, Y. Li, Y. Lin, Q. Liu, A. M. Asirif, X. Sun, Enhanced electrocatalytic nitrite reduction to ammonia over P-doped TiO<sub>2</sub> nanobelt array, *J. Mater. Chem. A*, 2022, **10**, 23494–23498.
- 6 L. Hu, D. Zhao, C. Liu, Y. Liang, D. Zheng, S. Sun, Q. Li, Q. Liu, Y. Luo, Y. Liao, L. Xie, X. Sun, Amorphous CoB nanoarray as a high-efficiency electrocatalyst for nitrite reduction to ammonia, *Inorg. Chem. Front.*, 2022, **9**, 6075–6079.
- 7 R. Wang, Z. Wang, X. Xiang, R. Zhang, X. Shi, X. Sun, MnO<sub>2</sub> nanoarrays: an efficient catalyst electrode for nitrite electroreduction toward sensing and NH<sub>3</sub> synthesis applications, *Chem. Commun.*, 2018, **54**, 10340–10342.
- 8 C. Wang, W. Zhou, Z. Sun, Y. Wang, B. Zhang, Y. Yu, Integrated selective nitrite reduction to ammonia with tetrahydroisoquinoline semi-dehydrogenation over a vacancy-rich Ni bifunctional electrode, *J. Mater. Chem. A*, 2021, **9**, 239–243.

- 9 J. Liang, B. Deng, Q. Liu, G. Wen, Q. Liu, T. Li, Y. Luo, A. A. Alshehri, K. A. Alzahrani, D. Ma, X. Sun, High-efficiency electrochemical nitrite reduction to ammonium using a Cu<sub>3</sub>P nanowire array under ambient conditions, *Green Chem.*, 2021, **23**, 5487–5493.
- 10 X. He, X. Li, X. Fan, J. Li, D. Zhao, L. Zhang, S. Sun, Y. Luo, D. Zheng, L. Xie, A. M. Asiri, Q. Liu, X. Sun, Ambient electroreduction of nitrite to ammonia over Ni nanoparticle supported on molasses-derived carbon sheets, *ACS Appl. Nano Mater.*, 2022, **5**, 14246–14250.
